# Supplementary material for: Genomic Islands in the Pathogenic Filamentous Fungus Aspergillus fumigatus
Source: PLoS Genet. 2008 Apr 11;4(4):e1000046. doi: 10.1371/journal.pgen.1000046 (PMC2289846; doi:10.1371/journal.pgen.1000046)
Supplement: Table S4 — Distribution of polymorphic alleles among A. fumigatus isolates. (0.02 MB XLS) [file pgen.1000046.s005.xls]

## Sheet: Table 4
Distribution of polymorphic alleles among A. fumigatus isolates
Af293 gene	AFUA_2G00910	AFUA_2G17420	AFUA_6G07010	AFUA_3G06170
Isolate	Pfs and STAND domain	Pfs and STAND domain	RosA	mating types	Isolation site
A1163	1	1	2	alpha	Clinical, France
Af10	2	2	n/a	HMG	Clinical, USA
Af210	2	2	n/a	alpha	Clinical, UK
Af230	2	1	n/a	alpha	Environmental, Sweden
Af245	1	2	n/a	n/a	Clinical, UK
Af293	2	2	1	HMG	Clinical, UK
Af294	2	2	n/a	alpha	Clinical, France
Af65	2	1	n/a	n/a	Clinical, USA
Af71	1	1	n/a	HMG	Clinical, USA
Af72	1	1	n/a	HMG	Clinical, USA
Af90	1	1	n/a	alpha	Clinical, USA
ATCC13073	1	1	n/a	n/a	Clinical, USA
WSA-1195	1	1	2	HMG	Clinical, USA
WSA-172	1	1	n/a	HMG	Clinical, USA
WSA-270	1	1	2	HMG	Clinical, India
WSA-271	2	1	3	n/a	Environmental, USA
WSA-419	1	1	1	n/a	Environmental, USA
WSA-446	1	1	1	n/a	Clinical, USA
WSA-449	1	1	2	HMG	Clinical, USA
WSA-621	1	1	1	n/a	Clinical, USA
WSA-622	1	2	1	n/a	Environmental, USA
WSA-623	2	1	2	n/a	Clinical, USA
