# Supplementary material for: Genomic Islands in the Pathogenic Filamentous Fungus Aspergillus fumigatus
Source: PLoS Genet. 2008 Apr 11;4(4):e1000046. doi: 10.1371/journal.pgen.1000046 (PMC2289846; doi:10.1371/journal.pgen.1000046)
Supplement: Table S12 — Selective constraints operating on virulence-associated genes. (0.02 MB XLS) [file pgen.1000046.s013.xls]

## Sheet: Table 12
Selective constraints operating on virulence-associated genes
Symbol	Protein name	Biological process	dN/dS
Pes1***	nonribosomal peptide synthase	secondary metabolism	0.03
CnaA	calcineurin catalytic subunit	signal transduction	0.03
CgrA	rRNA processing protein	ribosome biogenesis	0.04
PyrG*	orotidine 5'-phosphate decarboxylase	ribonucleotide biosynthesis	0.04
ChsE	chitin synthase	cell wall biogenesis	0.04
GpaB	G protein complex alpha subunit	signal transduction	0.05
LysF	homoaconitase	amino acid metabolism	0.06
Cat2	bifunctional catalase-peroxidase	response to stress	0.06
Cat1	mycelial catalase	response to stress	0.06
PksP*	polyketide synthetase	secondary metabolism	0.06
AcyA	adenylate cyclase	signal transduction	0.07
ChsG	chitin synthase	cell wall biogenesis	0.07
Alp2	autophagic serine protease	protein catabolism	0.07
LaeA	regulator of secondary metabolism	secondary metabolism	0.07
SidA	L-ornithine N5-oxygenase	secondary metabolism	0.08
Fos-1*	sensor histidine kinase	signal transduction	0.15
PabaA**	para-aminobenzoate synthase	protein modification	0.16
Ags3	alpha-1,3-glucan synthase	cell wall biogenesis	0.16
Ecm33	cell wall organization protein	cell wall biogenesis	0.16
Alp1	alkaline serine protease	protein catabolism	0.16
CpcA	bZIP transcription factor	regulation of transcription	0.17
PkaR	protein kinase regulatory subunit	signal transduction	0.17
RhbA	Rheb small monomeric GTPase	signal transduction	0.54
Genes in bold show evidence of accelerated evolution in the branch leading to the clade formed by the two A. fumigatus strains.
All other genes show no evidence for a different dN/dS value in this branch of the tree, relative to other branches.
Levels of significance: *, 0.05 > p ≥ 0.01; **, 0.01 > p ≥ 0.001; ***, p < 0.001.
